# Supplementary material
Source: Springer Nature journal article supplement (doi:10.1186/1860-5397-15-283)
Supplement: Additional file 1 [file 1860-5397-15-283-S1.pdf]

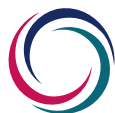

## Supporting Information

for

### **Bacterial terpene biosynthesis: challenges and opportunities for pathway engineering**

Eric J. N. Helfrich, Geng-Min Lin, Christopher A. Voigt and Jon Clardy

*Beilstein J. Org. Chem.* **2019**, *15*, 2889–2906. [doi:10.3762/bjoc.15.283](https://doi.org/10.3762/bjoc.15.283)

### **Additional figures and tables**

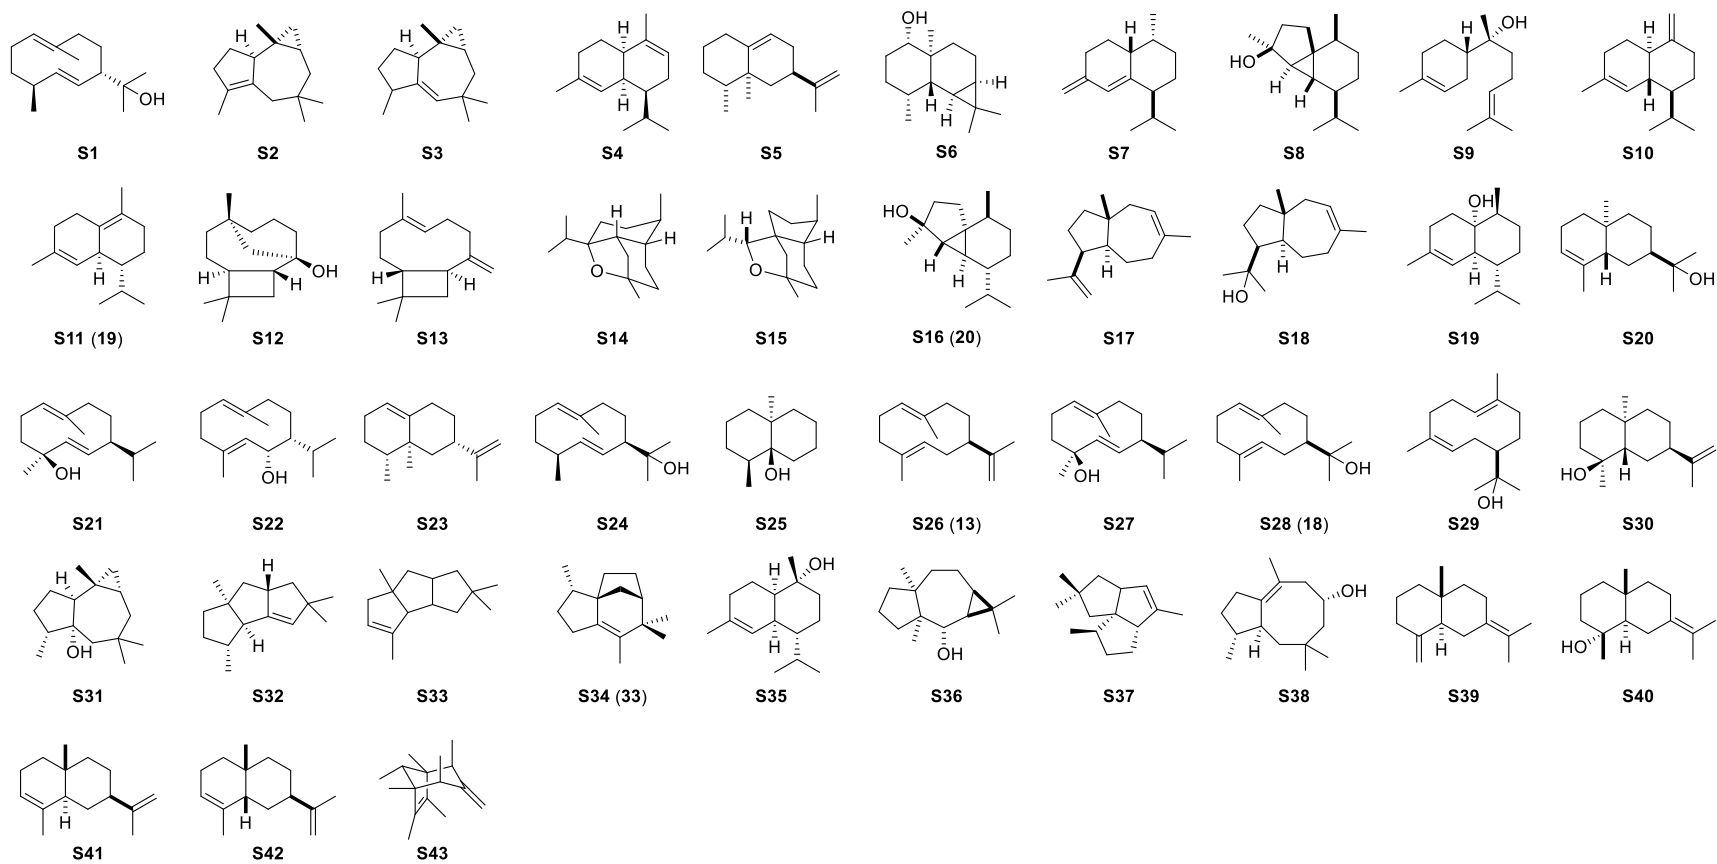

**Figure S1:** Characterized bacterial sesquiterpenes.

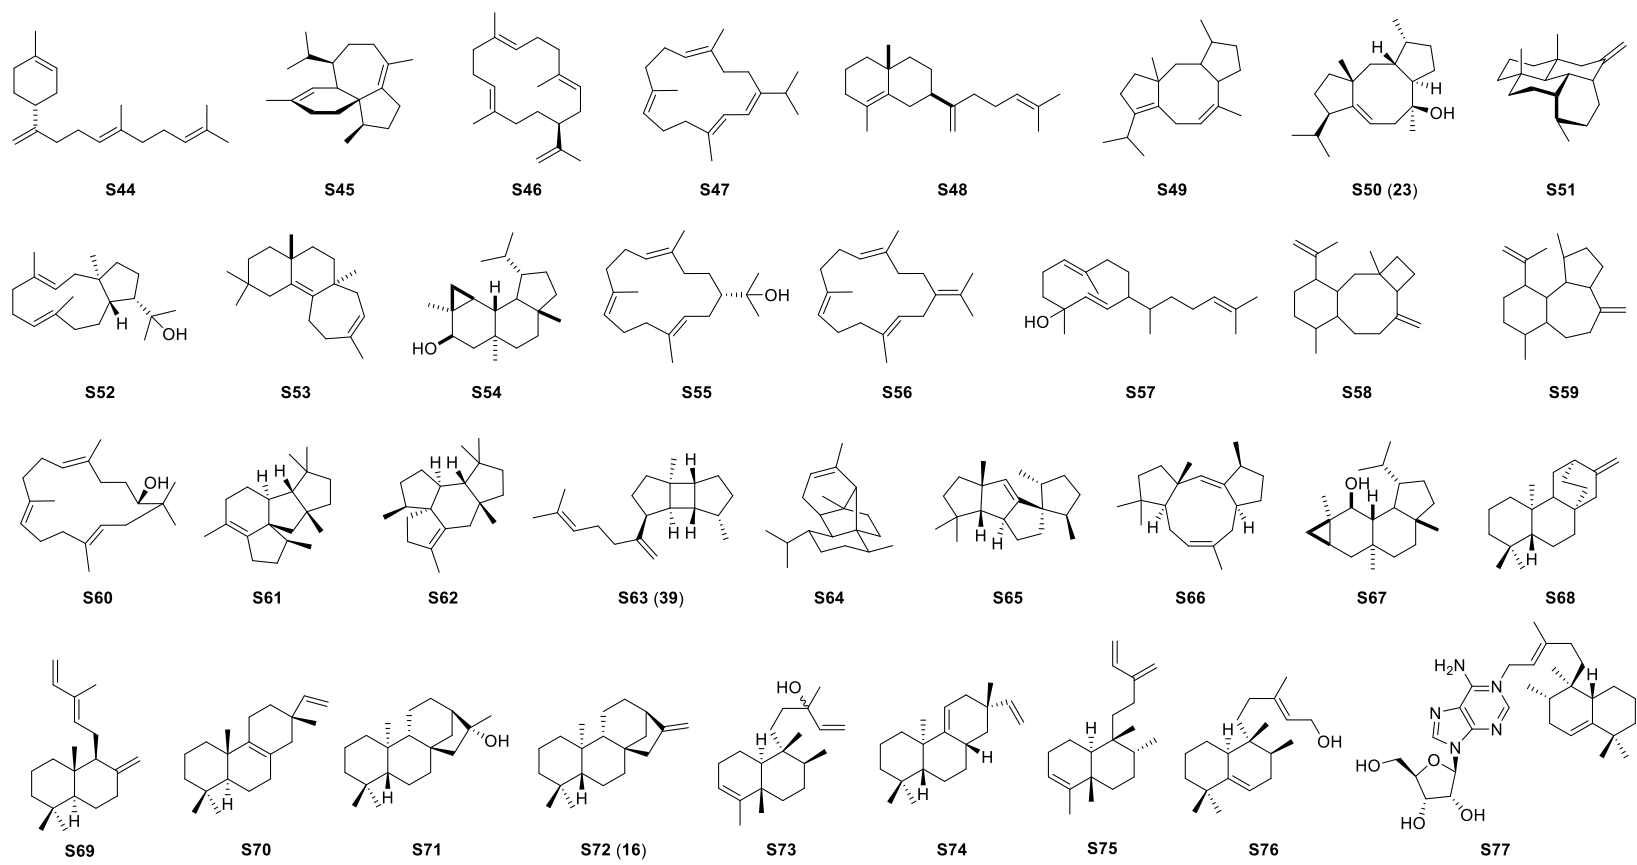

**Figure S2:** Characterized bacterial diterpenes.

**Table S1:** Characterized bacterial terpene cyclases.

| Terpene <sup>a</sup>                                                             | Uniprot #  | Name                        | Producing Strain                      | Host <sup>b</sup> | Study <sup>c</sup> | Isoprenoid Flux | Ref          |
|----------------------------------------------------------------------------------|------------|-----------------------------|---------------------------------------|-------------------|--------------------|-----------------|--------------|
| <b>Sesquiterpene</b>                                                             |            |                             |                                       |                   |                    |                 |              |
| (+)-allohedycaryol ( <b>S1</b> )                                                 | B2HGU3     | mmar_3220                   | <i>Mycobacterium marinum</i>          | SUKA22            | B                  | <i>fps</i>      | 1            |
| african-2-ene ( <b>S2</b> )* /<br>african-1-ene ( <b>S3</b> )*                   | D5SKM9     | sclav_p0985                 | <i>Streptomyces clavuligerus</i>      | SUKA22            | B                  | <i>fps</i>      | 1            |
| (-)- $\alpha$ -amorphene ( <b>S4</b> )                                           | D9XDR8     |                             | <i>Streptomyces viridochromogenes</i> | BL21(DE3)         | A/B                | endogenous      | 2-4          |
| aristolochene ( <b>S5</b> )*                                                     | A0A117E6J5 |                             | <i>Streptomyces acidiscabies</i>      | WT                |                    |                 | 5            |
| avermilol ( <b>S6</b> )                                                          | Q82RR7     | sav76                       | <i>Streptomyces avermitilis</i>       | BL21(DE3)         | A                  | N/A             | 5            |
|                                                                                  |            |                             |                                       | SUKA17            | B                  | <i>fps</i>      | 5            |
| bicyclosquiphellandrene ( <b>S7</b> )*                                           | A9GK58     | sce6369                     | <i>Sorangium cellulosum</i>           | SUKA22            | B                  | <i>fps</i>      | 1            |
| 10- <i>epi</i> -cubebol ( <b>S8</b> )* <sup>c</sup>                              |            |                             |                                       | C43(DE3)          | B                  | MEV pathway     | 6            |
| (-)- <i>epi</i> - $\alpha$ -bisabolol ( <b>S9</b> )                              | G5EKN0     | SC2                         | <i>Streptomyces citricolor</i>        | BL21(DE3)         | A                  | N/A             | 7            |
|                                                                                  |            |                             |                                       | TK21              | B                  | endogenous      | 7            |
| (-)- $\gamma$ -cadinene ( <b>S10</b> )                                           | C7PLV2     |                             | <i>Chitinophaga pinensis</i>          | BL21(DE3)         | A/B                | endogenous      | 2, 3         |
| (-)- $\delta$ -cadinene ( <b>S11, 19</b> )                                       | B5GS26     | ssc_g_02150/<br>sclav_p0328 | <i>Streptomyces clavuligerus</i>      | BL21(DE3)         | A                  | N/A             | 8            |
|                                                                                  |            |                             |                                       | JM109(DE3)        | B                  | MEV pathway     | 8            |
|                                                                                  |            |                             |                                       | SUKA22            | B                  | <i>fps</i>      | 1            |
| (+)-caryolan-1-ol ( <b>S12</b> )                                                 | B1W019     | gcoA                        | <i>Streptomyces griseus</i>           | BL21(DE3)         | A                  | N/A             | 9            |
|                                                                                  |            |                             |                                       | TK21              | B                  | endogenous      | 9            |
|                                                                                  |            |                             |                                       | SUKA22            | B                  | <i>fps</i>      | 1            |
| (-)-( <i>E</i> )- $\beta$ -caryophyllene ( <b>S13</b> )                          | K0K750     |                             | <i>Saccharothrix espanaensis</i>      | BL21(DE3)         | A/B                | endogenous      | 3, 10        |
| corvol ether A ( <b>S14</b> )* /<br>corvol ether B ( <b>S15</b> )*               | E4N7E5     |                             | <i>Kitasatospora setae</i>            | BL21(DE3)         | A                  | N/A             | 4, 11, 12    |
| <i>epi</i> -cubebol ( <b>S16, 20</b> )*                                          | D2B747     |                             | <i>Streptosporangium roseum</i>       | BL21(DE3)         | A/B                | endogenous      | 3, 4, 10, 12 |
| (+)-dauca-8,11-diene ( <b>S17</b> )* /<br>(+)-isodauc-8-en-11-ol ( <b>S18</b> )* | F2R8C1     | sven_0552                   | <i>Streptomyces venezuelae</i>        | SUKA22            | B                  | <i>fps</i>      | 1            |
|                                                                                  |            |                             |                                       | BL21(DE3)         | A                  | N/A             | 12, 13       |
| (+)-epicubebol ( <b>S19</b> )                                                    | B1W477     | gecA                        | <i>Streptomyces griseus</i>           | BL21(DE3)         | A                  | N/A             | 14           |
|                                                                                  |            |                             |                                       | TK21              | B                  | endogenous      | 14           |
|                                                                                  |            |                             |                                       | SUKA22            | B                  | <i>fps</i>      | 1            |
| (+)-eremophilene ( <b>S20</b> )                                                  | A9FZ87     | geoA/<br>sce8852            | <i>Sorangium cellulosum</i>           | BL21(DE3)         | A                  | N/A             | 15           |

|                                                    |            |                            |                                       |            |     |              |         |
|----------------------------------------------------|------------|----------------------------|---------------------------------------|------------|-----|--------------|---------|
|                                                    |            |                            |                                       | C43(DE3)   | B   | endogenous   | 15      |
|                                                    |            |                            |                                       | SUKA22     | B   | <i>fps</i>   | 1       |
| 7- <i>epi</i> - $\alpha$ -eudesmol (S21)*          | D9XD61     |                            | <i>Streptomyces viridochromogenes</i> | BL21(DE3)  | A/B | endogenous   | 2, 3    |
| (-)-germacradien-4-ol (S22)                        | G5EKM9     | SC1                        | <i>Streptomyces citricolor</i>        | BL21(DE3)  | A   | N/A          | 7       |
|                                                    |            |                            |                                       | TK21       | B   | endogenous   | 7       |
|                                                    | A0A097ZQD8 | slt18_1246                 | <i>Streptomyces lactacystinaeus</i>   | SUKA22     | B   | <i>fps</i>   | 1       |
| germacradien-6-ol (S23)                            | E8W6C7     |                            | <i>Streptomyces pratensis</i>         | BL21(DE3)  | A   | N/A          | 4, 16   |
| 1(10),5-germacradien-11-ol (S24)/<br>geosmin (S25) | Q9X839     | sco6073/<br>ScGS           | <i>Streptomyces coelicolor</i>        | pLysS      | A   | N/A          | 17-21   |
|                                                    | Q82L49     | sav2163/<br>geoA           | <i>Streptomyces avermitilis</i>       | BL21(DE3)  | A   | N/A          | 22      |
|                                                    | B2IUI7     | NP2                        | <i>Nostoc punctiforme</i>             | JM109      | B   | endogenous   | 23      |
|                                                    |            |                            |                                       | pLysS      | A   | N/A          | 24      |
|                                                    | B0FLN6     | spterp13                   | <i>Streptomyces peucetius</i>         | BL21(DE3)  | A   | N/A          | 25      |
| 1(10),5-germacradien-11-ol (S24)*:d                | A9F845     | sce1440                    | <i>Sorangium cellulosum</i>           | C43(DE3)   | B   | endogenous   | 6       |
| germacrene A (S26, 13)*                            | Q8YN85     | NS1/ alr4685               | <i>Nostoc sp. PCC 7120</i>            | JM109      | B   | endogenous   | 23      |
|                                                    |            |                            |                                       | BL21(DE3)  | A   | N/A          | 23      |
|                                                    | Q3MBN2     | ava_1982                   | <i>Anabaena variabilis</i>            | SUKA22     | B   | <i>fps</i>   | 1       |
| (4 <i>S</i> ,7 <i>S</i> )-germacrene D-4-ol (S27)  | A0A127Q4J7 |                            | <i>Collimonas pratensis</i>           | BL21(DE3)  | A   | N/A          | 4       |
| hedycaryol (S28, 18)*                              | A0A2N3Y098 |                            | <i>Saccharopolyspora spinosa</i>      | BL21(DE3)  | A/B |              | 10      |
| (2 <i>Z</i> ,6 <i>E</i> )-hedycaryol (S29)*        | E4MYY0     | HcS                        | <i>Kitasatospora setae</i>            | BL21(DE3)  | B   | endogenous   | 26      |
| (+)-intermedeol (S30)                              | B5GTQ6     | sclav_p0635                | <i>Streptomyces clavuligerus</i>      | SUKA22     | B   | <i>fps</i>   | 1       |
|                                                    |            |                            |                                       | BL21(DE3)  | A   | N/A          | 13      |
| isoafricanol (S31)                                 | G2P5T1     |                            | <i>Streptomyces violaceusniger</i>    | WT         |     |              | 27      |
|                                                    | A0A291SJC7 |                            | <i>Streptomyces malaysiensis</i>      | BL21(DE3)  | A   | N/A          | 28      |
| isohirsut-1-ene (cucumene, S32)                    | B5GLM7     |                            | <i>Streptomyces clavuligerus</i>      | SUKA22     | B   | <i>fggps</i> | 1, 29   |
|                                                    |            |                            |                                       | BL21(DE3)  | A   | N/A          | 30      |
| isohirsut-4-ene (S33)*                             | A0A097ZQA4 | slt18_1880                 | <i>Streptomyces lactacystinaeus</i>   | SUKA22     | B   | <i>ggps</i>  | 1, 29   |
| (+)- <i>epi</i> -isozizaene (S34, 33)              | Q9K499     | sco5222                    | <i>Streptomyces coelicolor</i>        | BL21(DE3)  | A   | N/A          | 31-34   |
|                                                    | Q82IV1     | sav3032                    | <i>Streptomyces avermitilis</i>       | BL21(DE3)  | A   | N/A          | 35      |
| (+)- <i>T</i> -muurolol (S35)                      | B5GW45     | sscg_03688/<br>sclav_p0068 | <i>Streptomyces clavuligerus</i>      | BL21(DE3)  | A   | N/A          | 8       |
|                                                    |            |                            |                                       | JM109(DE3) | B   | MEV pathway  | 8       |
|                                                    |            |                            |                                       | SUKA22     | B   | <i>fps</i>   | 1       |
|                                                    | A7NH01     |                            | <i>Roseiflexus castenholzii</i>       | BL21(DE3)  | A/B | endogenous   | 2-4, 36 |

|                                                                                                          |                           |                           |                                       |           |     |            |        |
|----------------------------------------------------------------------------------------------------------|---------------------------|---------------------------|---------------------------------------|-----------|-----|------------|--------|
| neomeranol B (S36)*<br>pentalenene (S37)                                                                 | A5UZ14                    | roseRS_3509               | <i>Roseiflexus sp.</i> RS-1           | SUKA22    | B   | <i>fps</i> | 8      |
|                                                                                                          | C9Z4F7                    |                           | <i>Streptomyces scabiei</i>           | BL21(DE3) | A   | N/A        | 13     |
|                                                                                                          | Q55012                    | PenA                      | <i>Streptomyces exfoliatus</i>        | BL21(DE3) | A   | N/A        | 37, 38 |
| pristinol (S38)<br>selina-4(15),7(11)-diene (S39)*                                                       | Q82IY4                    | sav2998/<br>PtlA          | <i>S. avermitilis</i>                 | XD        | B   | endogenous | 39     |
|                                                                                                          |                           |                           |                                       | BL21(DE3) | A   | N/A        | 40     |
|                                                                                                          | B5H7H3                    |                           | <i>Streptomyces pristinaespiralis</i> | BL21(DE3) | A   | N/A        | 41     |
| selina-7(11)-ene-4-ol (S40)*.d<br>$\alpha$ -selinene (S41)*<br>5- <i>epi</i> - $\alpha$ -selinene (S42)* | L8ERG6                    |                           | <i>Streptomyces rimosus</i>           | WT        |     |            | 42     |
|                                                                                                          | B5HDJ6                    |                           | <i>Streptomyces pristinaespiralis</i> | BL21(DE3) | A/B | endogenous | 2      |
|                                                                                                          | A0A097ZQE4                | sspSK_3051                | <i>Streptomyces sp.</i> SK 1894       | SUKA22    | B   | <i>fps</i> | 1      |
| sodorifen (S43) <sup>e</sup>                                                                             | A9B3Q4                    | haur_2988                 | <i>Herpetosiphon aurantiacus</i>      | SUKA22    | B   | <i>fps</i> | 1      |
|                                                                                                          | B2J4A4                    | NP1/<br>npun_R3832        | <i>Nostoc punctiforme</i>             | JM109     | B   | endogenous | 23     |
|                                                                                                          |                           |                           |                                       | BL21(DE3) | A   | N/A        | 23     |
|                                                                                                          |                           |                           |                                       | SUKA22    | B   | <i>fps</i> | 1      |
|                                                                                                          | A0A318P116/<br>A0A318P5Q0 | sod_c20750/<br>sod_c20760 | <i>Serratia plymuthica</i> 4Rx13      | BL21(DE3) | A/B | N/A        | 43, 44 |

### Type I Diterpene

|                                     |            |                     |                                        |                 |     |                         |        |
|-------------------------------------|------------|---------------------|----------------------------------------|-----------------|-----|-------------------------|--------|
| axinyssene (S44)*#                  | A0A084SQV5 | CysTC2              | <i>Archangium violaceum</i>            | BW25113         | B   | MEV pathway             | 45     |
| bonnadiene (S45)                    | A0A1G9UQQ0 | BdS                 | <i>Allokutzneria albata</i>            | BL21(DE3)       | A   | N/A                     | 46     |
| ( <i>S</i> )-cembrene A (S46)       | A0A1G9S4L4 | CAS                 | <i>Allokutzneria albata</i>            | BL21(DE3)       | A   | N/A                     | 47     |
| cembrene C (S47)                    | Q1AYR1     | rxyl_0493           | <i>Rubrobacter xylanophilus</i>        | SUKA22          | B   | <i>ggps</i>             | 1      |
| clavulatriene A (S48)*.d            | B5H135     | sclav_p1169         | <i>Streptomyces clavuligerus</i>       | SUKA22          | B   | <i>ggps</i>             | 1, 29  |
| cyclooctat-7(8),10(14)-diene (S49)* | A0A097ZQD0 | slt18_1078          | <i>Streptomyces lactacystinaeus</i>    | SUKA22          | B   | <i>ggps</i>             | 1, 29  |
| cyclooctat-9-en-7-ol (S50, 23)      | C9K1X5     | CotB2               | <i>Streptomyces melanosporofaciens</i> | BL21(DE3)       | A   | N/A                     | 48, 49 |
|                                     |            |                     |                                        | <i>S. albus</i> | B   | <i>ggps</i>             | 48     |
|                                     |            |                     |                                        | BL21(DE3)       | A/B | <i>dxs/dxr/idi/ggps</i> | 49-51  |
| hydropyrene (S51)                   | D5SK09     | sclav_p0765/<br>HpS | <i>Streptomyces clavuligerus</i>       | Rosetta2        | A   | N/A                     | 52     |
|                                     |            |                     |                                        | SUKA22          | B   | <i>ggps</i>             | 1, 29  |
|                                     |            |                     |                                        | BL21(DE3)       | A   | N/A                     | 53     |
| 18-hydroxydolabella-3,7-diene (S52) | C7PA56     | HdS                 | <i>Chitinophaga pinensis</i>           | BL21(DE3)       | A   | N/A                     | 54     |
|                                     |            |                     |                                        | NB              | B   | endogenous              | 54     |
|                                     |            |                     |                                        |                 |     |                         |        |
| lydicene (S53)*#                    | A0A0D4DXU3 | StlTC               | <i>Streptomyces lydicus</i>            | BW25113         | B   | MEV pathway             | 45     |
| neoverrucosan-5 $\beta$ -ol (S54)*# | H6KZW8     | SapTC1              | <i>Saprospira grandis</i>              | BW25113         | B   | MEV pathway             | 45     |

|                                                                            |                           |                         |                                    |            |     |                         |        |
|----------------------------------------------------------------------------|---------------------------|-------------------------|------------------------------------|------------|-----|-------------------------|--------|
| ( <i>R</i> )-nephtenol ( <b>S55</b> )/<br>cembrene C isomer ( <b>S56</b> ) | M1V9Q0                    | DtcycA                  | <i>Streptomyces</i> sp. SANK 60404 | BL21(DE3)  | A   | N/A                     | 55     |
| obscuronatin ( <b>S57</b> )*                                               | A9B3Q3                    | haur_2987               | <i>Herpetosiphon aurantiacus</i>   | SUKA22     | B   | ggps                    | 1      |
| odyverdiene A ( <b>S58</b> )* /<br>odyverdiene B ( <b>S59</b> )*           | A0A097ZQD1                | nd90_0354               | <i>Streptomyces</i> sp. ND90       | SUKA22     | B   | ggps                    | 1, 29  |
| <b>S60</b> <sup>d</sup>                                                    | M1VDX3                    | DtcycB                  | <i>Streptomyces</i> sp. SANK 60404 | BL21(DE3)  | A   | N/A                     | 55     |
| phomopsene ( <b>S61</b> )/<br>allokutznerene ( <b>S62</b> )                | A0A1G9VRW7                | PmS                     | <i>Allokutzneria albata</i>        | BL21(DE3)  | A   | N/A                     | 46     |
| spata-13,17-diene ( <b>S63</b> , <b>39</b> )                               | UPI000BAF81BA             | SpS                     | <i>Streptomyces xinghaiensis</i>   | BL21(DE3)  | A   | N/A                     | 36, 56 |
| spiroalbatene ( <b>S64</b> )                                               | A0A1H0BVV7                | SaS                     | <i>Allokutzneria albata</i>        | BL21(DE3)  | A   | N/A                     | 36, 46 |
| (-)-spiroviolene ( <b>S65</b> )                                            | P0DPK6                    | SvS                     | <i>Streptomyces violens</i>        | BL21(DE3)  | A   | N/A                     | 57     |
| tsukubadiene ( <b>S66</b> )                                                | I2N045                    | stsu_20912              | <i>Streptomyces tsukubensis</i>    | SUKA22     | B   | ggps                    | 1, 29  |
|                                                                            |                           |                         |                                    | BL21(DE3)  | A   | N/A                     | 36, 57 |
| verrucosane-2 $\beta$ -ol ( <b>S67</b> )*#                                 | A9WGY1                    | ChITC2                  | <i>Chloroflexus aurantiacus</i>    | BW25113    | B   | MEV pathway             | 45     |
|                                                                            | A0A178MLU0                | ChITC5                  | <i>Chloroflexus islandicus</i>     | BW25113    | B   | MEV pathway             | 45     |
| <b>TypeII/I Diterpene<sup>f</sup></b>                                      |                           |                         |                                    |            |     |                         |        |
| <i>ent</i> -atiserene ( <b>S68</b> )                                       | DBL2U6/<br>DBL2U4         | PtmT2/<br>PtmT1         | <i>Streptomyces platensis</i>      | BL21(DE3)  | A/B | <i>dxs/dxr/idi/ggps</i> | 58, 59 |
| biformene ( <b>S69</b> )                                                   | A0A0H5BB10/<br>A0A0H5BN57 | CldB/<br>CldD           | <i>Streptomyces cylabdanicus</i>   | JM109(DE3) | A   | NA                      | 60, 61 |
|                                                                            |                           |                         |                                    | SUKA22     | B   | ggps                    |        |
| isopimara-8,15-diene ( <b>S70</b> )                                        | A8M709/<br>A8M708         | sare_1288/<br>sare_1287 | <i>Salinispora arenicola</i>       | C41(DE3)   | B   | ggps                    | 62     |
| (16 <i>R</i> )- <i>ent</i> -kauran-16-ol ( <b>S71</b> )                    | DBL2U6/<br>DBL2U9         | PtmT2/<br>PtmT3         | <i>Streptomyces platensis</i>      | BL21(DE3)  | A/B | <i>dxs/dxr/idi/ggps</i> | 58, 59 |
| <i>ent</i> -kaur-16-ene ( <b>S72</b> , <b>16</b> )                         | Q45221/<br>Q45222         | blr2149/<br>blr42150    | <i>Bradyrhizobium japonicum</i>    | C41(DE3)   | B   | endogenous              | 63     |
|                                                                            | Q989L7/<br>Q989L6         |                         | <i>Mesorhizobium japonicum</i>     | C41(DE3)   | B   | <i>dxs/dxr/idi/ggps</i> | 64     |
|                                                                            | P55538/<br>P55537         |                         | <i>Sinorhizobium fredii</i>        | C41(DE3)   | B   | <i>dxs/dxr/idi/ggps</i> | 64     |
|                                                                            | Q8KLD5/<br>Q8KLD4         |                         | <i>Rhizobium etli</i>              | C41(DE3)   | B   | <i>dxs/dxr/idi/ggps</i> | 64     |
| (+)-kolavelool ( <b>S73</b> )                                              | A9AWD5/<br>A9AWD6         | haur_2145/<br>haur_2146 | <i>Herpetosiphon aurantiacus</i>   | BL21(DE3)  | A   | N/A                     | 65     |

|                                                                             |                   |                     |                                   |                   |        |                   |             |
|-----------------------------------------------------------------------------|-------------------|---------------------|-----------------------------------|-------------------|--------|-------------------|-------------|
| <i>ent</i> -pimara-9(11),15-diene ( <b>S74</b> )                            | Q5KSN5/<br>Q5KSN4 |                     | <i>Streptomyces sp.</i> KO-3988   | M15/pREP4         | A      | N/A               | 66, 67      |
| terpentetriene ( <b>S75</b> )                                               | Q9AJE4/<br>Q9AJE3 |                     | <i>Kitasatospora griseola</i>     | M15/pREP4         | A      | N/A               | 68, 69      |
| tuberculosinol ( <b>S76</b> )/<br>1-tuberculosinyladenosinec ( <b>S77</b> ) | O50406/<br>P9WJ61 | Rv3377c/<br>Rv3378c | <i>Mycobacterium tuberculosis</i> | TK23<br>BL21(DE3) | B<br>A | endogenous<br>N/A | 68<br>70-73 |

<sup>a</sup>terpenes labeled with asterisk have unclear absolute stereochemistry, and those labeled with pound signs are the product of UbiA-type terpene cyclases; <sup>b</sup>BL21(DE3), BW25113, C41(DE3), C43(DE3), JM109, JM109(DE3), M15/pREP4, pLysS [BL21(DE3)pLysS], and Rossetta2(DE3) are *Escherichia coli* strains. SUKA16, SUKA17, and SUKA22 are *Streptomyces avermitilis* strains. TK21 and TK23 are *Streptomyces lividans* strains. NB: *Nicotiana benthamiana*. XD: *Xanthophyllomyces dendrorhous*. WT: terpenes are detected in the headspace of wild-type strains, and the assignment of terpene cyclase was based on analysis of genomic sequence and exclusion of other common terpene cyclases. <sup>c</sup>A: *in vitro*, B: *in vivo* studies; <sup>d</sup>several products were produced; <sup>e</sup>requires two enzymes: methyltransferase / cyclase; <sup>f</sup>accession numbers and protein names in the order of type II diterpene synthase / type I diterpene synthase.



**Table S2:** Functional characterization of bacterial tailoring enzymes for terpene modification.

| Uniprot #                                                                                                                                             | Name                                | Class <sup>a</sup> | Strain                                                                                              | Host <sup>b</sup> | Study <sup>c</sup> | Substrate <sup>d</sup>                    | Reaction                             | Ref    |
|-------------------------------------------------------------------------------------------------------------------------------------------------------|-------------------------------------|--------------------|-----------------------------------------------------------------------------------------------------|-------------------|--------------------|-------------------------------------------|--------------------------------------|--------|
| <b>Albaflavenone (S78, 35)</b>                                                                                                                        |                                     |                    |                                                                                                     |                   |                    |                                           |                                      |        |
| Q9K498                                                                                                                                                | CYP107A1<br>sco5223                 | CYP                | <i>Streptomyces coelicolor</i>                                                                      | BL21(DE3)         | A                  | <i>epi</i> -isozizaene ( <b>S34, 33</b> ) | hydroxylation-oxidation              | 74, 75 |
| Q81IV2                                                                                                                                                | CYP107A2<br>sav3031                 | CYP                | <i>Streptomyces avermitilis</i>                                                                     | SUKA16            | B                  | <i>epi</i> -isozizaene ( <b>S34, 33</b> ) | hydroxylation-oxidation <sup>e</sup> | 35     |
| <p>S34 (33) <math>\xrightarrow[\text{sav3031}]{\text{sco5223}}</math> S79 (34) <math>\xrightarrow[\text{sav3031}]{\text{sco5223}}</math> S78 (35)</p> |                                     |                    |                                                                                                     |                   |                    |                                           |                                      |        |
| <b>Pentalenolactone (S80, 32)</b>                                                                                                                     |                                     |                    |                                                                                                     |                   |                    |                                           |                                      |        |
| Q82IY3/<br>E3VWK7/<br>E3VWJ1                                                                                                                          | PtII/<br>PenI/<br>PntI <sup>f</sup> | CYP                | <i>Streptomyces avermitilis</i> /<br><i>Streptomyces exfoliatus</i> /<br><i>Streptomyces arenae</i> | BL21(DE3)         | A                  | pentalenene ( <b>S37</b> )                | 4e-oxidation <sup>g</sup>            | 76, 77 |
| Q82IZ1/<br>E3VWK0/<br>E3VWI4                                                                                                                          | PtIH/<br>PenH/<br>PntH <sup>f</sup> | AKG                | as above                                                                                            | BL21(DE3)         | A                  | 1-deoxypentaleniate ( <b>S81</b> )        | hydroxylation                        | 77-79  |
| Q82IY9<br>E3VWK2/<br>E3VWI6                                                                                                                           | PtIF/<br>PenF/<br>PntF <sup>f</sup> | DH                 | as above                                                                                            | BL21(DE3)         | A                  | <b>S82</b>                                | 2e-oxidation                         | 77, 80 |
| Q82IY8                                                                                                                                                | PtIE                                | FMO                | <i>Streptomyces avermitilis</i>                                                                     | BL21(DE3)         | A                  | <b>S83</b>                                | Baeyer-Villiger oxidation            | 81     |
| Q82IY7                                                                                                                                                | PtID                                | AKG                | <i>Streptomyces avermitilis</i>                                                                     | BL21(DE3)         | A                  | neopentalenolactone D ( <b>S84</b> )      | dehydrogenation                      | 77     |
| E3VWK3/<br>E3VWI7                                                                                                                                     | PenE/<br>PntE                       | FMO                | <i>Streptomyces exfoliatus</i> /<br><i>Streptomyces arenae</i>                                      | BL21(DE3)         | A                  | <b>S83</b>                                | Baeyer-Villiger oxidation            | 77     |
| E3VWK4/<br>E3VWI8                                                                                                                                     | PenD/<br>PntD                       | AKG                | as above                                                                                            | BL21(DE3)         | A                  | pentalenolactone D ( <b>S86</b> )         | dehydrogenation-epoxidation          | 77     |
| E3VWJ9/<br>E3VWI3                                                                                                                                     | PenM/<br>PntM                       | CYP                | as above                                                                                            | BL21(DE3)         | A                  | pentalenolactone F ( <b>S87, 31</b> )     | rearrangement                        | 82     |

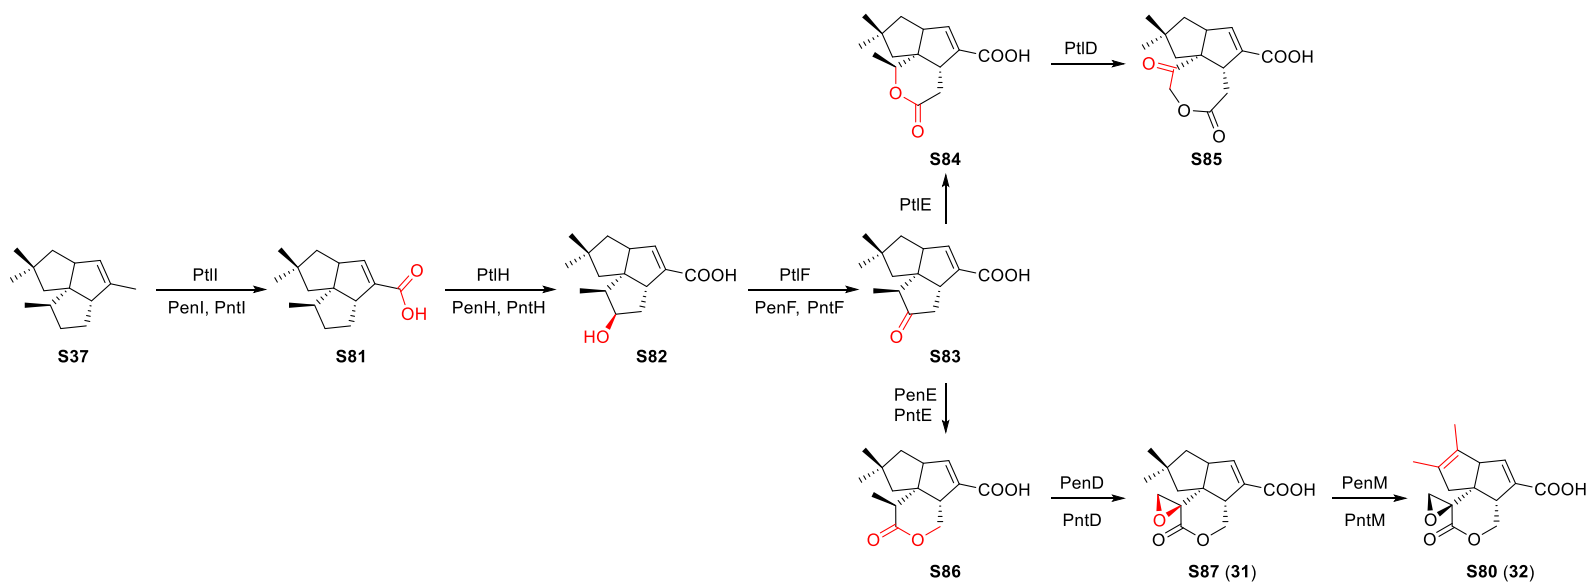

### Cyclooctatin (S88, 25)

|        |       |     |                                        |                 |   |                                |               |    |
|--------|-------|-----|----------------------------------------|-----------------|---|--------------------------------|---------------|----|
| C9K1X6 | CotB3 | CYP | <i>Streptomyces melanosporofaciens</i> | <i>S. albus</i> | B | cyclooctat-9-en-7-ol (S50, 23) | hydroxylation | 48 |
| C9K1X7 | CotB4 | CYP | <i>Streptomyces melanosporofaciens</i> | <i>S. albus</i> | B | S89 (24)                       | hydroxylation | 48 |

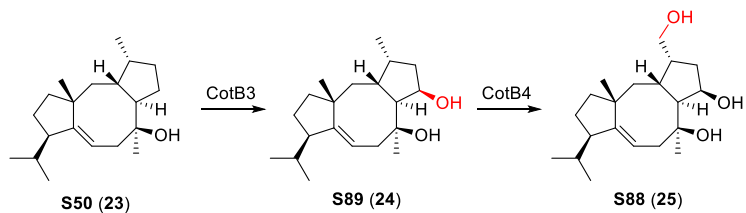

### Cyslabdan (S90)

|            |      |     |                                   |        |   |                 |                           |    |
|------------|------|-----|-----------------------------------|--------|---|-----------------|---------------------------|----|
| A0A0H5B5M5 | CldC | CYP | <i>Streptomyces cyslabdanicus</i> | SUKA22 | C | biformene (S69) | hydroxylation-epoxidation | 60 |
|------------|------|-----|-----------------------------------|--------|---|-----------------|---------------------------|----|

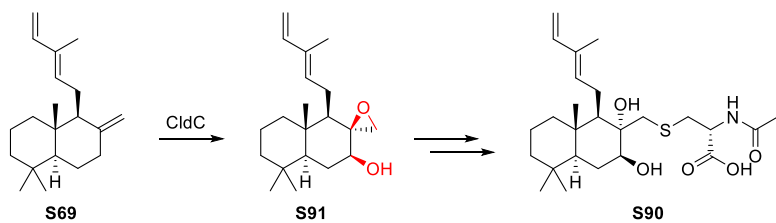

## Gibberellinsh

|                          |                       |     |                                                                       |    |   |                                               |                                    |    |
|--------------------------|-----------------------|-----|-----------------------------------------------------------------------|----|---|-----------------------------------------------|------------------------------------|----|
| P55540/<br>Q59205        | CYP117A2              | CYP | <i>Sinorhizobium fredii</i> /<br><i>Bradyrhizobium diazoefficiens</i> | SM | C | <i>ent</i> -kaurene ( <b>S72, 16</b> )        | 6e-oxidation                       | 83 |
| P55543/<br>Q59204        | CYP114                | CYP | as above                                                              | SM | C | <i>ent</i> -kaurenoic acid ( <b>S92, 26</b> ) | hydroxylation/<br>ring contraction | 83 |
| P55541/<br>Q45219        | SDR                   | DH  | as above                                                              | SM | C | <b>S93 (28)</b>                               | 2e-oxidation                       | 83 |
| P55544/<br>Q59203        | CYP112A2              | CYP | as above                                                              | SM | C | gibberellin A12 ( <b>S94</b> )                | demethylation-<br>lactonization    | 83 |
| UPI00040E8C18/<br>Q98A71 | SMCYP115/<br>MICYP115 | CYP | <i>Sinorhizobium meliloti</i> /<br><i>Mesorhizobium japonicum</i>     | SM | C | gibberellin A9 ( <b>S95</b> )                 | hydroxylation                      | 84 |

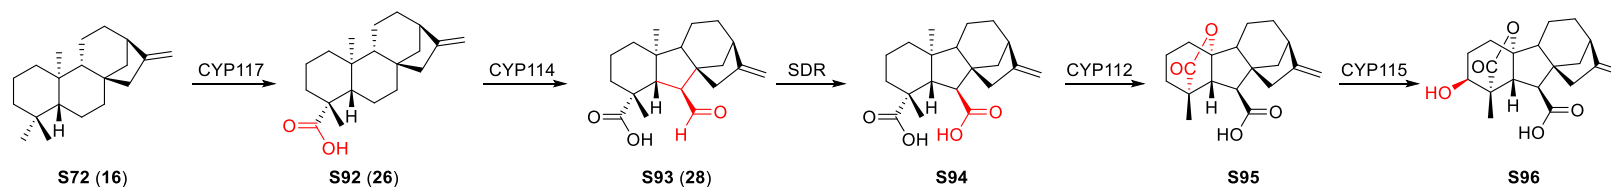

## Isopimara-8,15-dien-19-ol (S97)

|        |                        |     |                              |          |   |                                     |               |    |
|--------|------------------------|-----|------------------------------|----------|---|-------------------------------------|---------------|----|
| A8M707 | CYP1051A1<br>sare_1286 | CYP | <i>Salinispora arenicola</i> | C43(DE3) | B | isopimara-8,15-diene ( <b>S70</b> ) | hydroxylation | 62 |
|--------|------------------------|-----|------------------------------|----------|---|-------------------------------------|---------------|----|

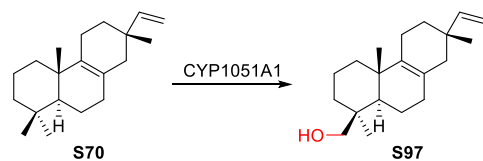

## (+)-*O*-methylkolavelool (S98)

|        |           |    |                                  |           |   |                               |             |    |
|--------|-----------|----|----------------------------------|-----------|---|-------------------------------|-------------|----|
| A9AWD7 | Haur_2147 | MT | <i>Herpetosiphon aurantiacus</i> | BL21(DE3) | A | (+)-kolavelool ( <b>S73</b> ) | methylation | 65 |
|--------|-----------|----|----------------------------------|-----------|---|-------------------------------|-------------|----|

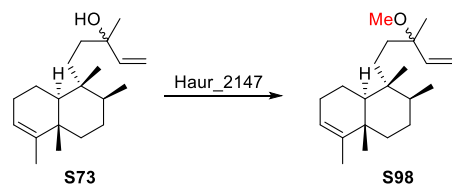

## Platensimycin (S99) / Platencin (S100)

|            |       |      |                               |           |     |                        |                                                |        |
|------------|-------|------|-------------------------------|-----------|-----|------------------------|------------------------------------------------|--------|
| DBL2V0     | PtmO5 | CYP  | <i>Streptomyces platensis</i> | BL21(DE3) | A   | <b>S101 (29)</b>       | hydroxylation/<br>ether formation <sup>i</sup> | 59, 85 |
| DBL2U7     | PtmO3 | AKG  | as above                      | BL21(DE3) | A/B | <b>S102 (30), S109</b> | hydroxylation                                  | 86     |
| DBL2V2     | PtmO6 | AKG  | as above                      | BL21(DE3) | A/B | <b>S103, S110</b>      | hydroxylation                                  | 86     |
| DBL2W5     | PtmO8 | DH   | as above                      | BL21(DE3) | A/B | <b>S104, S111</b>      | oxidation                                      | 86     |
| A0A0A0UXJ2 | PtmO1 | DH   | as above                      | BL21(DE3) | A/B | <b>S105, S112</b>      | reduction                                      | 86     |
| DBL2T7     | PtmA1 | CoAS | as above                      | mutant    | B   | <b>S106, S113</b>      | adenylation                                    | 87     |
| DBL2U1     | PtmA2 | CoAS | as above                      | BL21(DE3) | A/B | <b>S107, S114</b>      | ligation                                       | 87     |
| DBL2W0     | PtmC  | NAT  | as above                      | mutant    | B   | <b>S108, S115</b>      | ligation                                       | 88     |

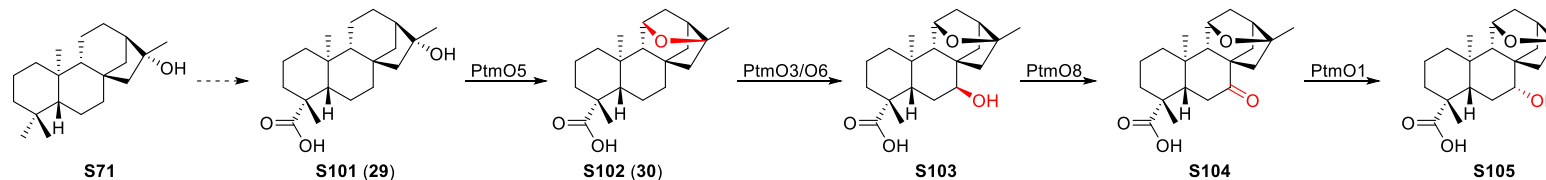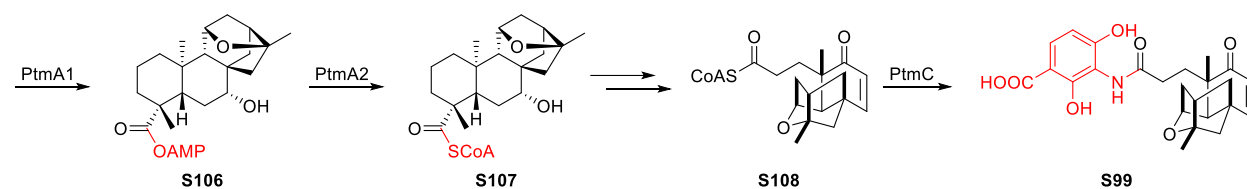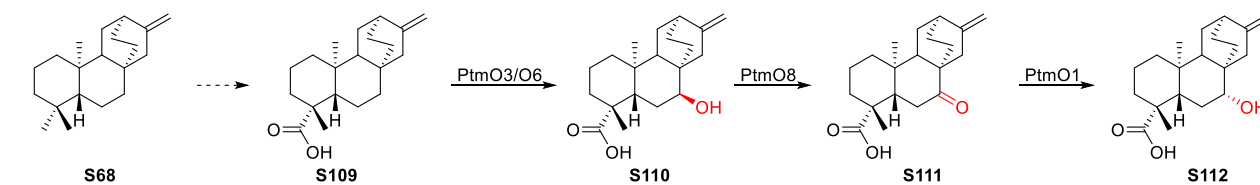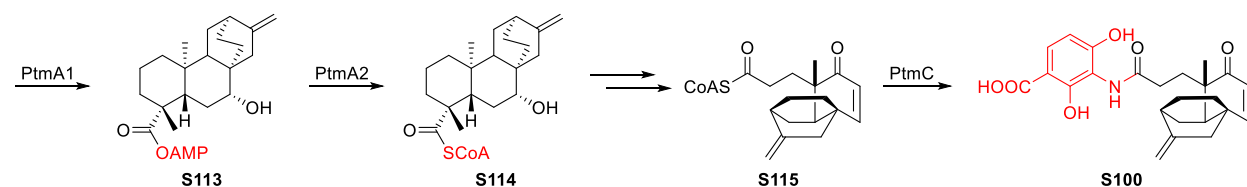

### Others

|        |                     |     |                            |              |     |                   |           |    |
|--------|---------------------|-----|----------------------------|--------------|-----|-------------------|-----------|----|
| P14779 | P450 <sub>BM3</sub> | CYP | <i>Bacillus megaterium</i> | DH5 $\alpha$ | A/C | *valencene (S116) | oxidation | 89 |
|--------|---------------------|-----|----------------------------|--------------|-----|-------------------|-----------|----|

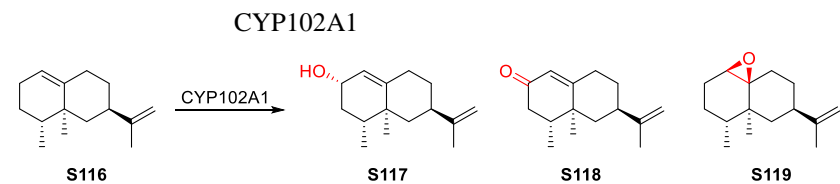

|        |          |     |                               |       |     |                                      |               |        |
|--------|----------|-----|-------------------------------|-------|-----|--------------------------------------|---------------|--------|
| P18326 | CYP105A1 | CYP | <i>Streptomyces griseolus</i> | JM109 | A/C | *abietic acid ( <b>S120</b> )        | hydroxylation | 90, 91 |
|        |          |     |                               | BM    | C   |                                      |               | 90     |
|        |          |     |                               | JM109 | A/C | *dehydroabietic acid ( <b>S121</b> ) | hydroxylation | 90     |
|        |          |     |                               | BM    | C   |                                      |               | 90     |
|        |          |     |                               | JM109 | A/C | *isopimaric acid ( <b>S122</b> )     | epoxidation   | 90     |
|        |          |     |                               | BM    | C   |                                      |               | 90     |

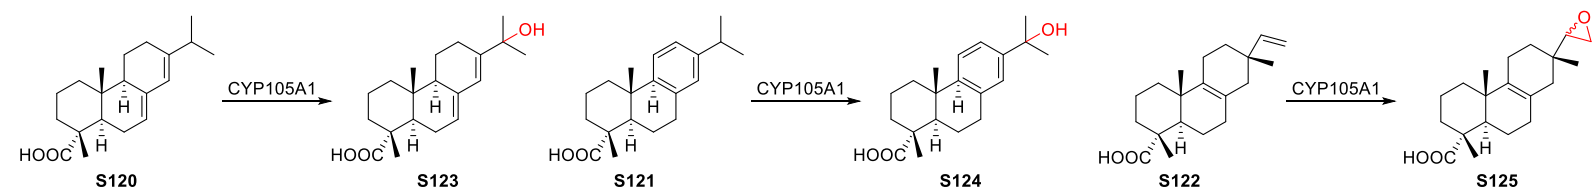

|        |          |     |                       |           |   |                                     |               |    |
|--------|----------|-----|-----------------------|-----------|---|-------------------------------------|---------------|----|
| Q82518 | CYP105D7 | CYP | <i>S. avermitilis</i> | SUKA13    | B | *1-deoxy-pentalenate ( <b>S81</b> ) | hydroxylation | 92 |
|        | sav7469  |     |                       | BL21(DE3) | A |                                     |               | 92 |

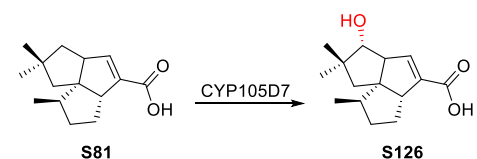

|        |          |     |                            |           |   |                               |               |    |
|--------|----------|-----|----------------------------|-----------|---|-------------------------------|---------------|----|
| Q06069 | CYP106A2 | CYP | <i>Bacillus megaterium</i> | BL21(DE3) | A | *abietic acid ( <b>S120</b> ) | hydroxylation | 93 |
|        |          |     |                            | BM        | C |                               |               |    |

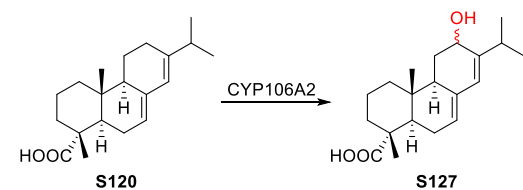

|        |          |     |                          |           |     |                            |                             |    |
|--------|----------|-----|--------------------------|-----------|-----|----------------------------|-----------------------------|----|
| U5U1Z3 | CYP109B1 | CYP | <i>Bacillus subtilis</i> | BL21(DE3) | A/C | *valencene ( <b>S116</b> ) | hydroxylation/<br>oxidation | 94 |
|--------|----------|-----|--------------------------|-----------|-----|----------------------------|-----------------------------|----|

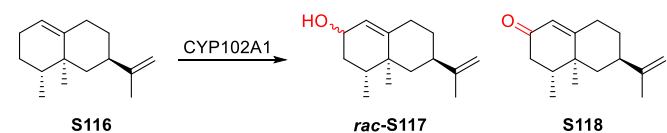

|                                                                                    |                     |     |                                     |                                     |                               |                                                                                                                                                                                                                                                                               |                                                                                                                    |                                                      |
|------------------------------------------------------------------------------------|---------------------|-----|-------------------------------------|-------------------------------------|-------------------------------|-------------------------------------------------------------------------------------------------------------------------------------------------------------------------------------------------------------------------------------------------------------------------------|--------------------------------------------------------------------------------------------------------------------|------------------------------------------------------|
| Q8YN84                                                                             | CYP110C1            | CYP | <i>Nostoc punctiforme</i>           | JM109 /<br>BL21(DE3)                | B                             | germacrene A ( <b>S26</b> , <b>13</b> )                                                                                                                                                                                                                                       | epoxidation-<br>cyclization                                                                                        | 23                                                   |
| 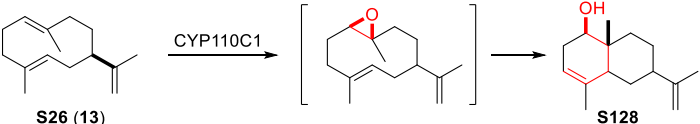  |                     |     |                                     |                                     |                               |                                                                                                                                                                                                                                                                               |                                                                                                                    |                                                      |
| Q8YMU4                                                                             | CYP110E1            | CYP | <i>Nostoc sp.</i> PCC 7120          | BL21(DE3)                           | C                             | *2,3-dihydrozerumbone ( <b>S130</b> ) <sup>j</sup>                                                                                                                                                                                                                            | hydroxylation                                                                                                      | 15                                                   |
|   |                     |     |                                     |                                     |                               |                                                                                                                                                                                                                                                                               |                                                                                                                    |                                                      |
| Q47KL3                                                                             | CYP154E1            | CYP | <i>Thermobifida fusca</i>           | BL21(DE3)                           | A                             | *(+)-nootkatone ( <b>S118</b> )<br>*(+)-nootkatol ( <b>S117</b> )                                                                                                                                                                                                             | hydroxylation<br>oxidation                                                                                         | 95<br>95                                             |
|  |                     |     |                                     |                                     |                               |                                                                                                                                                                                                                                                                               |                                                                                                                    |                                                      |
| A9FDB7                                                                             | CYP260A1<br>sce1588 | CYP | <i>Sorangium cellulosum</i> So ce56 | BL21(DE3)                           | A/C<br>C<br>C                 | *(+)-nootkatone ( <b>S118</b> )<br>*zerumbone ( <b>S129</b> )<br>*(+)-3(15)-cedren-4-ol ( <b>S134</b> )                                                                                                                                                                       | oxidation<br>oxidation<br>oxidation                                                                                | 96, 97<br>97<br>97                                   |
|  |                     |     |                                     |                                     |                               |                                                                                                                                                                                                                                                                               |                                                                                                                    |                                                      |
| A9FZ85                                                                             | CYP264B1<br>sce8851 | CYP | <i>Sorangium cellulosum</i> So ce56 | C43(DE3)<br>C43(DE3) /<br>BL21(DE3) | A/B/C<br>C<br>C<br>A/C<br>A/C | (+)-eremophilene ( <b>S20</b> )<br>*(+)-nootkatone ( <b>S118</b> )<br>*zerumbone ( <b>S129</b> )<br>*α-humulene ( <b>S135</b> )<br>*β-caryophyllene ( <b>S13</b> )<br>*α-cedrene ( <b>S136</b> )<br>*(+)-α-longipinene ( <b>S137</b> )<br>*(-)-isolongifolene ( <b>S138</b> ) | hydroxylation<br>hydroxylation<br>hydroxylation<br>hydroxylation<br>hydroxylation<br>hydroxylation<br>4e-oxidation | 15, 97<br>97<br>97<br>97, 98<br>97<br>97<br>98<br>98 |

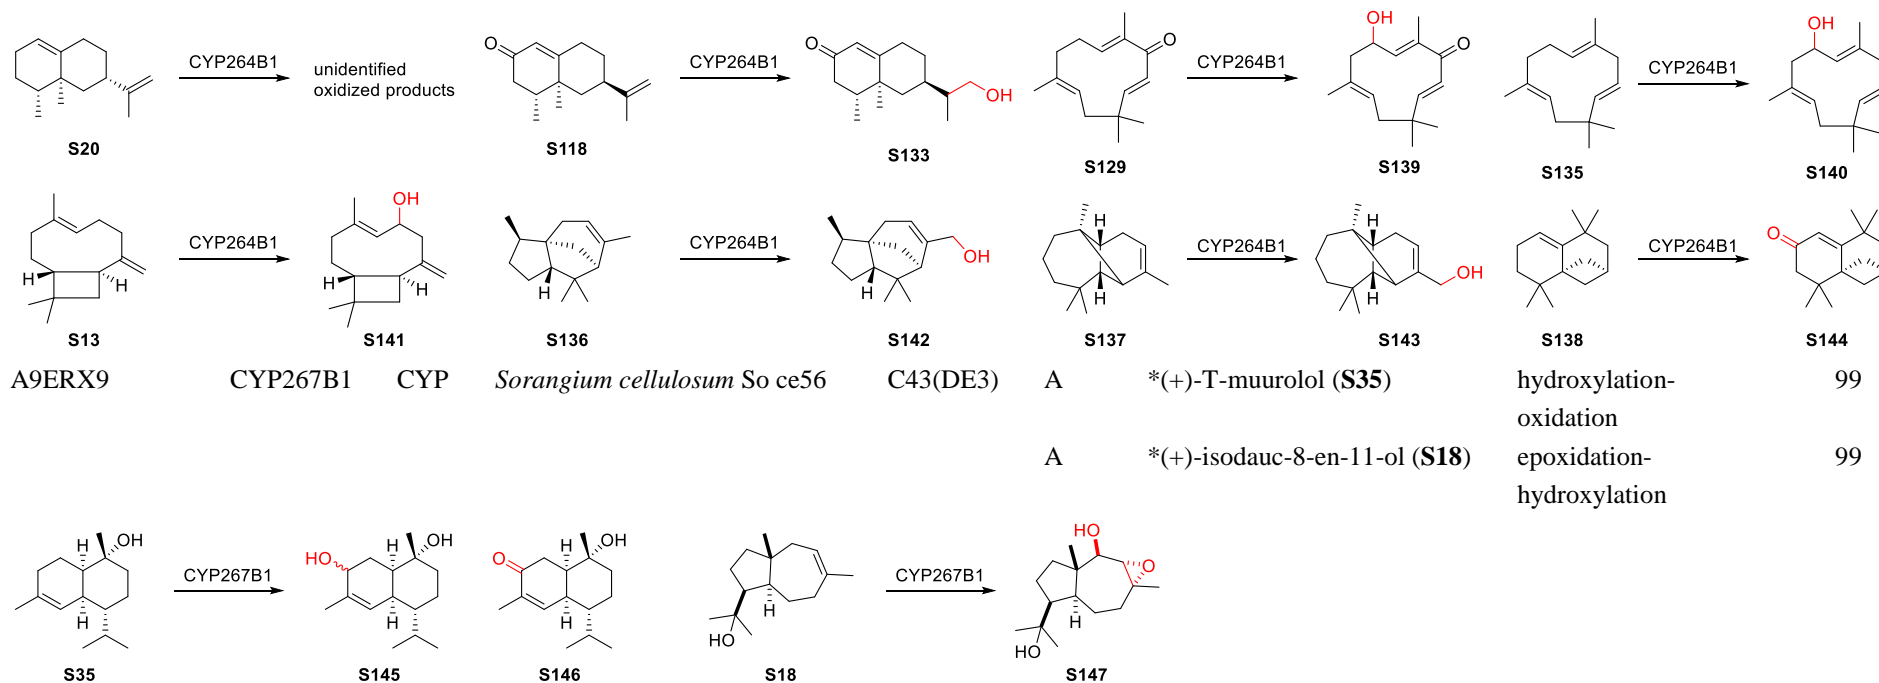

<sup>a</sup>AKG:  $\alpha$ -ketoglutarate-dependent non-heme iron enzyme, CoAS: acyl-CoA synthetase, CYP: cytochrome P450, DH: NAD(P)<sup>+</sup>-dependent dehydrogenase, FMO: Flavin-dependent monooxygenase, MT: methyltransferase, NAT: *N*-acetyl transferase; <sup>b</sup>BL21(DE3), C43(DE3), DH5 $\alpha$ , JM109: *E. coli* strains. SUKA13, SUKA16, SUKA22: *S. avermitilis* strains. BM: *Bacillus megaterium* MS941. SM: *Sinorhizobium meliloti* 1021. <sup>c</sup>A: in vitro, B: in vivo: the heterologous host expresses both cyclase and tailoring enzymes, or gene deletion / complementation experiments in the producing strains, C: growing cells or resting cells expressing tailoring enzymes are fed with substrate directly; <sup>d</sup>substrates marked with asterisk are not produced by any enzyme(s) encoded nearby the tailoring enzymes; <sup>e</sup>epoxidation took place when expressed in *S. avermitilis*, which might come from the action of endogenous P450 of the heterologous host. Also see Figure 8 in the main text; <sup>f</sup>only Ptl enzymes were experimentally verified. Pen and Pnt enzymes' function were implied by sequence homology. <sup>g</sup>6e-oxidation was expected, but *in vitro* reaction only catalyzed 4e-oxidation; <sup>h</sup>*Sinorhizobium fredii* enzymes were studied by feeding substrates to *Sinorhizobium meliloti* 1021 expressing enzymes of interest. Substrates were also fed to *S. fredii* / *Bradyrhizobium diazoefficiens* deletion strains to map out the biosynthetic pathway; <sup>i</sup>in the *in vitro* studies, HCl was required to trigger the ether ring formation; <sup>j</sup>it was claimed to come from the reduction of zerumbone (the fed substrate, **S128**) by endogenous enzymes of *E. coli*.

## References

1. Yamada, Y.; Kuzuyama, T.; Komatsu, M.; Shin-ya, K.; Omura, S.; Cane, D. E.; Ikeda, H., Terpene synthases are widely distributed in bacteria. *Proceedings of the National Academy of Sciences* **2015**, *112*, 857-862.
2. Rabe, P.; Dickschat, J. S., Rapid chemical characterization of bacterial terpene synthases. *Angewandte Chemie - International Edition* **2013**, *52*, 1810-1812.
3. Rabe, P.; Schmitz, T.; Dickschat, J. S., Mechanistic investigations on six bacterial terpene cyclases. *Beilstein Journal of Organic Chemistry* **2016**, *12*, 1839-1850.
4. Rinkel, J.; Rabe, P.; Garbeva, P.; Dickschat, J. S., Lessons from 1,3-Hydride Shifts in Sesquiterpene Cyclizations. *Angewandte Chemie International Edition* **2016**, *55*, 13593-13596.
5. Chou, W. K. W.; Fanizza, I.; Uchiyama, T.; Komatsu, M.; Ikeda, H.; Cane, D. E., Genome Mining in *Streptomyces avermitilis*: Cloning and Characterization of SAV\_76, the Synthase for a New Sesquiterpene, Avermitilol. *Journal of the American Chemical Society* **2010**, *132*, 8850-8851.

6. Schiffrin, A.; Khatri, Y.; Kirsch, P.; Thiel, V.; Schulz, S.; Bernhardt, R., A single terpene synthase is responsible for a wide variety of sesquiterpenes in *Sorangium cellulosum* Soce56. *Organic & Biomolecular Chemistry* **2016**, *14*, 3385-3393.
7. Nakano, C.; Kudo, F.; Eguchi, T.; Ohnishi, Y., Genome Mining Reveals Two Novel Bacterial Sesquiterpene Cyclases: (-)-Germacradien-4-ol and (-)-epi- $\alpha$ -Bisabolol Synthases from *Streptomyces citricolor*. *ChemBioChem* **2011**, *12*, 2271-2275.
8. Hu, Y.; Chou, W. K. W.; Hopson, R.; Cane, D. E., Genome Mining in *Streptomyces clavuligerus*: Expression and Biochemical Characterization of Two New Cryptic Sesquiterpene Synthases. *Chemistry & Biology* **2011**, *18*, 32-37.
9. Nakano, C.; Horinouchi, S.; Ohnishi, Y., Characterization of a Novel Sesquiterpene Cyclase Involved in (+)-Caryolan-1-ol Biosynthesis in *Streptomyces griseus*. *Journal of Biological Chemistry* **2011**, *286*, 27980-27987.
10. Dickschat, J. S.; Pahirulzaman, K. A. K.; Rabe, P.; Klapschinski, T. A., An Improved technique for the rapid chemical characterisation of bacterial terpene cyclases. *ChemBioChem* **2014**, *15*, 810-814.
11. Rabe, P.; Pahirulzaman, K. A. K.; Dickschat, J. S., Structures and biosynthesis of corvol ethers - Sesquiterpenes from the actinomycete *kitasatospora setae*. *Angewandte Chemie - International Edition* **2015**, *54*, 6041-6045.
12. Rabe, P.; Dickschat, J. S., The EIMS fragmentation mechanisms of the sesquiterpenes corvol ethers A and B, epi -cubebol and isodauc-8-en-11-ol. *Beilstein Journal of Organic Chemistry* **2016**, *12*, 1380-1394.
13. Rabe, P.; Rinkel, J.; Klapschinski, T. A.; Barra, L.; Dickschat, J. S., A method for investigating the stereochemical course of terpene cyclisations. *Organic & Biomolecular Chemistry* **2016**, *14*, 158-164.
14. Nakano, C.; Tezuka, T.; Horinouchi, S.; Ohnishi, Y., Identification of the SGR6065 gene product as a sesquiterpene cyclase involved in (+)-epicubenol biosynthesis in *Streptomyces griseus*. *The Journal of Antibiotics* **2012**, *65*, 551-558.
15. Schiffrin, A.; Ly, T. T. B.; Günnewich, N.; Zapp, J.; Thiel, V.; Schulz, S.; Hannemann, F.; Khatri, Y.; Bernhardt, R., Characterization of the Gene Cluster CYP264B1- geo A from *Sorangium cellulosum* So ce56: Biosynthesis of (+)-Eremophilene and Its Hydroxylation. *ChemBioChem* **2015**, *16*, 337-344.
16. Rabe, P.; Barra, L.; Rinkel, J.; Riclea, R.; Citron, C. A.; Klapschinski, T. A.; Janusko, A.; Dickschat, J. S., Conformational Analysis, Thermal Rearrangement, and EI-MS Fragmentation Mechanism of (1(10)E,4E,6S,7R)-Germacradien-6-ol by <sup>13</sup>C-Labeling Experiments. *Angewandte Chemie - International Edition* **2015**, *54*, 13448-13451.
17. Jiang, J.; He, X.; Cane, D. E., Geosmin Biosynthesis. *Streptomyces coelicolor* Germacradienol/Germacrene D Synthase Converts Farnesyl Diphosphate to Geosmin. *Journal of the American Chemical Society* **2006**, *128*, 8128-8129.
18. Jiang, J.; Cane, D. E., Geosmin Biosynthesis. Mechanism of the Fragmentation–Rearrangement in the Conversion of Germacradienol to Geosmin. *Journal of the American Chemical Society* **2008**, *130*, 428-429.
19. Cane, D. E.; Watt, R. M., Expression and mechanistic analysis of a germacradienol synthase from *Streptomyces coelicolor* implicated in geosmin biosynthesis. *Proceedings of the National Academy of Sciences* **2003**, *100*, 1547-1551.
20. Jiang, J.; He, X.; Cane, D. E., Biosynthesis of the earthy odorant geosmin by a bifunctional *Streptomyces coelicolor* enzyme. *Nature Chemical Biology* **2007**, *3*, 711-715.
21. Harris, G. G.; Lombardi, P. M.; Pemberton, T. A.; Matsui, T.; Weiss, T. M.; Cole, K. E.; Köksal, M.; Murphy, F. V.; Vedula, L. S.; Chou, W. K. W.; Cane, D. E.; Christianson, D. W., Structural Studies of Geosmin Synthase, a Bifunctional Sesquiterpene Synthase with  $\alpha\alpha$  Domain Architecture That Catalyzes a Unique Cyclization–Fragmentation Reaction Sequence. *Biochemistry* **2015**, *54*, 7142-7155.
22. Cane, D. E.; He, X.; Kobayashi, S.; Ōmura, S.; Ikeda, H., Geosmin Biosynthesis in *Streptomyces avermitilis*. Molecular Cloning, Expression and Mechanistic Study of the Germacradienol/Geosmin Synthase. *The Journal of Antibiotics* **2006**, *59*, 471-479.



23. Agger, S. A.; Lopez-Gallego, F.; Hoye, T. R.; Schmidt-Dannert, C., Identification of sesquiterpene synthases from *Nostoc punctiforme* PCC 73102 and *Nostoc* sp. strain PCC 7120. *Journal of Bacteriology* **2008**, *190*, 6084-6096.
24. Jiang, J.; Saint, C. P.; Cane, D. E.; Monis, P. T., Isolation and Characterization of the Gene Associated with Geosmin Production in Cyanobacteria. *Environmental Science & Technology* **2008**, *42*, 8027-8032.
25. Ghimire, G. P.; Oh, T. J.; Lee, H. C.; Kim, B. G.; Sohng, J. K., Cloning and functional characterization of the germacradienol synthase (spterp13) from *Streptomyces peucetius* ATCC 27952. *Journal of Microbiology and Biotechnology* **2008**, *18*, 1216-1220.
26. Baer, P.; Rabe, P.; Citron, C. A.; De Oliveira Mann, C. C.; Kaufmann, N.; Groll, M.; Dickschat, J. S., Hedycaryol synthase in complex with nerolidol reveals terpene cyclase mechanism. *ChemBioChem* **2014**, *15*, 213-216.
27. Riclea, R.; Citron, C. A.; Rinkel, J.; Dickschat, J. S., Identification of isoaffricanol and its terpene cyclase in *Streptomyces violaceusniger* using CLSA-NMR. *Chemical Communications* **2014**, *50*, 4228-4230.
28. Rabe, P.; Samborskyy, M.; Leadlay, P. F.; Dickschat, J. S., Isoaffricanol synthase from *Streptomyces malaysiensis*. *Organic & Biomolecular Chemistry* **2017**, *15*, 2353-2358.
29. Yamada, Y.; Arima, S.; Nagamitsu, T.; Johmoto, K.; Uekusa, H.; Eguchi, T.; Shin-Ya, K.; Cane, D. E.; Ikeda, H., Novel terpenes generated by heterologous expression of bacterial terpene synthase genes in an engineered *Streptomyces* host. *Journal of Antibiotics* **2015**, *68*, 385-394.
30. Chow, J.-Y.; Tian, B.-X.; Ramamoorthy, G.; Hillerich, B. S.; Seidel, R. D.; Almo, S. C.; Jacobson, M. P.; Poulter, C. D., Computational-guided discovery and characterization of a sesquiterpene synthase from *Streptomyces clavuligerus*. *Proceedings of the National Academy of Sciences* **2015**, *112*, 5661-5666.
31. Lin, X.; Hopson, R.; Cane, D. E., Genome mining in *Streptomyces coelicolor*: Molecular cloning and characterization of a new sesquiterpene synthase. *Journal of the American Chemical Society* **2006**, *128*, 6022-6023.
32. Lin, X.; Cane, D. E., Biosynthesis of the Sesquiterpene Antibiotic Albaflavenone in *Streptomyces coelicolor*. Mechanism and Stereochemistry of the Enzymatic Formation of Epi-isozizaene. *Journal of the American Chemical Society* **2009**, *131*, 6332-6333.
33. Aaron, J. A.; Lin, X.; Cane, D. E.; Christianson, D. W., Structure of Epi-Isozizaene Synthase from *Streptomyces coelicolor* A3(2), a Platform for New Terpenoid Cyclization Templates. *Biochemistry* **2010**, *49*, 1787-1797.
34. Li, R.; Chou, W. K. W.; Himmelberger, J. A.; Litwin, K. M.; Harris, G. G.; Cane, D. E.; Christianson, D. W., Reprogramming the Chemodiversity of Terpenoid Cyclization by Remolding the Active Site Contour of epi -Isozizaene Synthase. *Biochemistry* **2014**, *53*, 1155-1168.
35. Takamatsu, S.; Lin, X.; Nara, A.; Komatsu, M.; Cane, D. E.; Ikeda, H., Characterization of a silent sesquiterpenoid biosynthetic pathway in *Streptomyces avermitilis* controlling epi-isozizaene albaflavenone biosynthesis and isolation of a new oxidized epi-isozizaene metabolite. *Microbial Biotechnology* **2011**, *4*, 184-191.
36. Rinkel, J.; Rabe, P.; Dickschat, J. S., The EI-MS Fragmentation Mechanisms of Bacterial Sesquiterpenes and Diterpenes. *European Journal of Organic Chemistry* **2019**, *2019*, 351-359.
37. Cane, D. E.; Sohng, J. K.; Lamberson, C. R.; Rudnicki, S. M.; Wu, Z.; Lloyd, M. D.; Oliver, J. S.; Hubbard, B. R., Pentalenene Synthase. Purification, Molecular Cloning, Sequencing, and High-Level Expression in *Escherichia coli* of a Terpenoid Cyclase from *Streptomyces* UC5319. *Biochemistry* **1994**, *33*, 5846-5857.
38. Lesburg, C. A., Crystal Structure of Pentalenene Synthase: Mechanistic Insights on Terpenoid Cyclization Reactions in Biology. *Science* **1997**, *277*, 1820-1824.
39. Melillo, E.; Muntendam, R.; Quax, W. J.; Kayser, O., Heterologous expression of pentalenene synthase (PSS) from *Streptomyces* UC5319 in *Xanthophyllomyces dendrorhous*. *Journal of Biotechnology* **2012**, *161*, 302-307.

40. Tetzlaff, C. N.; You, Z.; Cane, D. E.; Takamatsu, S.; Omura, S.; Ikeda, H., A Gene Cluster for Biosynthesis of the Sesquiterpenoid Antibiotic Pentalenolactone in *Streptomyces avermitilis* †. *Biochemistry* **2006**, *45*, 6179-6186.
41. Klapschinski, T. A.; Rabe, P.; Dickschat, J. S., Pristinol, a Sesquiterpene Alcohol with an Unusual Skeleton from *Streptomyces pristinaespiralis*. *Angewandte Chemie International Edition* **2016**, *55*, 10141-10144.
42. Rabe, P.; Citron, C. A.; Dickschat, J. S., Volatile Terpenes from Actinomycetes: A Biosynthetic Study Correlating Chemical Analyses to Genome Data. *ChemBioChem* **2013**, *14*, 2345-2354.
43. von Reuss, S.; Domik, D.; Lemfack, M. C.; Magnus, N.; Kai, M.; Weise, T.; Piechulla, B., Sodorifen Biosynthesis in the Rhizobacterium *Serratia plymuthica* Involves Methylation and Cyclization of MEP-Derived Farnesyl Pyrophosphate by a SAM-Dependent C-Methyltransferase. *Journal of the American Chemical Society* **2018**, *140*, 11855-11862.
44. Duell, E. R.; D'Agostino, P. M.; Shapiro, N.; Woyke, T.; Fuchs, T. M.; Gulder, T. A. M., Direct pathway cloning of the sodorifen biosynthetic gene cluster and recombinant generation of its product in *E. coli*. *Microbial Cell Factories* **2019**, *18*, 32-32.
45. Yang, Y.-I.; Zhang, S.; Ma, K.; Xu, Y.; Tao, Q.; Chen, Y.; Chen, J.; Guo, S.; Ren, J.; Wang, W.; Tao, Y.; Yin, W.-B.; Liu, H., Discovery and Characterization of a New Family of Diterpene Cyclases in Bacteria and Fungi. *Angewandte Chemie International Edition* **2017**, *56*, 4749-4752.
46. Lauterbach, L.; Rinkel, J.; Dickschat, J. S., Two Bacterial Diterpene Synthases from *Allokutzneria albata* Produce Bonnadiene, Phomopsene, and Allokutznerene. *Angewandte Chemie International Edition* **2018**, *57*, 8280-8283.
47. Rinkel, J.; Lauterbach, L.; Rabe, P.; Dickschat, J. S., Two Diterpene Synthases for Spiroalbatene and Cembrene A from *Allokutzneria albata*. *Angewandte Chemie International Edition* **2018**, *57*, 3238-3241.
48. Kim, S. Y.; Zhao, P.; Igarashi, M.; Sawa, R.; Tomita, T.; Nishiyama, M.; Kuzuyama, T., Cloning and Heterologous Expression of the Cyclooctatin Biosynthetic Gene Cluster Afford a Diterpene Cyclase and Two P450 Hydroxylases. *Chemistry and Biology* **2009**, *16*, 736-743.
49. Meguro, A.; Motoyoshi, Y.; Teramoto, K.; Ueda, S.; Totsuka, Y.; Ando, Y.; Tomita, T.; Kim, S.-Y.; Kimura, T.; Igarashi, M.; Sawa, R.; Shinada, T.; Nishiyama, M.; Kuzuyama, T., An Unusual Terpene Cyclization Mechanism Involving a Carbon-Carbon Bond Rearrangement. *Angewandte Chemie International Edition* **2015**, *54*, 4353-4356.
50. Görner, C.; Häuslein, I.; Schrepfer, P.; Eisenreich, W.; Brück, T., Targeted Engineering of Cyclooctat-9-en-7-ol Synthase: A Stereospecific Access to Two New Non-natural Fusicoccane-Type Diterpenes. *ChemCatChem* **2013**, *5*, 3289-3298.
51. Tomita, T.; Kim, S.-Y.; Teramoto, K.; Meguro, A.; Ozaki, T.; Yoshida, A.; Motoyoshi, Y.; Mori, N.; Ishigami, K.; Watanabe, H.; Nishiyama, M.; Kuzuyama, T., Structural Insights into the CotB2-Catalyzed Cyclization of Geranylgeranyl Diphosphate to the Diterpene Cyclooctat-9-en-7-ol. *ACS Chemical Biology* **2017**, *12*, 1621-1628.
52. Driller, R.; Janke, S.; Fuchs, M.; Warner, E.; Mhashal, A. R.; Major, D. T.; Christmann, M.; Brück, T.; Loll, B., Towards a comprehensive understanding of the structural dynamics of a bacterial diterpene synthase during catalysis. *Nature Communications* **2018**, *9*, 3971-3971.
53. Rinkel, J.; Rabe, P.; Chen, X.; Köllner, T. G.; Chen, F.; Dickschat, J. S., Mechanisms of the Diterpene Cyclases  $\beta$ -Pinene Synthase from *Dictyostelium discoideum* and Hydroperylene Synthase from *Streptomyces clavuligerus*. *Chemistry - A European Journal* **2017**, *23*, 10501-10505.
54. Dickschat, J. S.; Rinkel, J.; Rabe, P.; Beyraghdar Kashkooli, A.; Bouwmeester, H. J., 18-Hydroxydolabella-3,7-diene synthase – a diterpene synthase from *Chitinophaga pinensis*. *Beilstein Journal of Organic Chemistry* **2017**, *13*, 1770-1780.
55. Meguro, A.; Tomita, T.; Nishiyama, M.; Kuzuyama, T., Identification and Characterization of Bacterial Diterpene Cyclases that Synthesize the Cembrane Skeleton. *ChemBioChem* **2013**, *14*, 316-321.

56. Rinkel, J.; Lauterbach, L.; Dickschat, J. S., Spata-13,17-diene Synthase-An Enzyme with Sesqui-, Di-, and Sesterterpene Synthase Activity from *Streptomyces xinghaiensis*. *Angewandte Chemie International Edition* **2017**, *56*, 16385-16389.
57. Rabe, P.; Rinkel, J.; Dolja, E.; Schmitz, T.; Nubbemeyer, B.; Luu, T. H.; Dickschat, J. S., Mechanistic Investigations of Two Bacterial Diterpene Cyclases: Spiroviolene Synthase and Tsukubadiene Synthase. *Angewandte Chemie International Edition* **2017**, *56*, 2776-2779.
58. Rudolf, J. D.; Dong, L.-B.; Cao, H.; Hatzos-Skintges, C.; Osipiuk, J.; Endres, M.; Chang, C.-Y.; Ma, M.; Babnigg, G.; Joachimiak, A.; Phillips, G. N.; Shen, B., Structure of the ent-Copalyl Diphosphate Synthase PtmT2 from *Streptomyces platensis* CB00739, a Bacterial Type II Diterpene Synthase. *Journal of the American Chemical Society* **2016**, *138*, 10905-10915.
59. Rudolf, J. D.; Dong, L.-B.; Manoogian, K.; Shen, B., Biosynthetic Origin of the Ether Ring in Platensimycin. *Journal of the American Chemical Society* **2016**, *138*, 16711-16721.
60. Ikeda, H.; Shin-ya, K.; Nagamitsu, T.; Tomoda, H., Biosynthesis of mercapturic acid derivative of the labdane-type diterpene, cyclabdan that potentiates imipenem activity against methicillin-resistant *Staphylococcus aureus*: cyclabdan is generated by mycothiol-mediated xenobiotic detoxification. *Journal of Industrial Microbiology & Biotechnology* **2016**, *43*, 325-342.
61. Yamada, Y.; Komatsu, M.; Ikeda, H., Chemical diversity of labdane-type bicyclic diterpene biosynthesis in Actinomycetales microorganisms. *The Journal of Antibiotics* **2016**, *69*, 515-523.
62. Xu, M.; Hillwig, M. L.; Lane, A. L.; Tiernan, M. S.; Moore, B. S.; Peters, R. J., Characterization of an Orphan Diterpenoid Biosynthetic Operon from *Salinispora arenicola*. *Journal of Natural Products* **2014**, *77*, 2144-2147.
63. Morrone, D.; Chambers, J.; Lowry, L.; Kim, G.; Anterola, A.; Bender, K.; Peters, R. J., Gibberellin biosynthesis in bacteria: Separate ent-copalyl diphosphate and ent-kaurene synthases in *Bradyrhizobium japonicum*. *FEBS Letters* **2009**, *583*, 475-480.
64. Hershey, D. M.; Lu, X.; Zi, J.; Peters, R. J., Functional Conservation of the Capacity for ent-Kaurene Biosynthesis and an Associated Operon in Certain Rhizobia. *Journal of Bacteriology* **2014**, *196*, 100-106.
65. Nakano, C.; Oshima, M.; Kurashima, N.; Hoshino, T., Identification of a New Diterpene Biosynthetic Gene Cluster that Produces O-Methylkolavelool in *Herpetosiphon aurantiacus*. *ChemBioChem* **2015**, *16*, 772-781.
66. Ikeda, C.; Hayashi, Y.; Itoh, N.; Seto, H.; Dairi, T., Functional analysis of eubacterial ent-copalyl diphosphate synthase and pimara-9(11),15-diene synthase with unique primary sequences. *Journal of Biochemistry* **2007**, *141*, 37-45.
67. Kawasaki, T.; Kuzuyama, T.; Kuwamori, Y.; Matsuura, N.; Itoh, N.; Furihata, K.; Seto, H.; Dairi, T., Presence of Copalyl Diphosphate Synthase Gene in an Actinomycete Possessing the Mevalonate Pathway. *The Journal of Antibiotics* **2004**, *57*, 739-747.
68. Dairi, T.; Hamano, Y.; Kuzuyama, T.; Itoh, N.; Furihata, K.; Seto, H., Eubacterial diterpene cyclase genes essential for production of the isoprenoid antibiotic terpentecin. *Journal of Bacteriology* **2001**, *183*, 6085-6094.
69. Hamano, Y.; Kuzuyama, T.; Itoh, N.; Furihata, K.; Seto, H.; Dairi, T., Functional analysis of eubacterial diterpene cyclases responsible for biosynthesis of a diterpene antibiotic, terpentecin. *Journal of Biological Chemistry* **2002**, *277*, 37098-37104.
70. Nakano, C.; Okamura, T.; Sato, T.; Dairi, T.; Hoshino, T., Mycobacterium tuberculosis H37Rv3377c encodes the diterpene cyclase for producing the halimane skeleton. *Chemical Communications* **2005**, 1016-1016.
71. Nakano, C.; Hoshino, T., Characterization of the Rv3377c Gene Product, a Type-B Diterpene Cyclase, from the Mycobacterium tuberculosis H37 Genome. *ChemBioChem* **2009**, *10*, 2060-2071.
72. Nakano, C.; Ootsuka, T.; Takayama, K.; Mitsui, T.; Sato, T.; Hoshino, T., Characterization of the Rv3378c Gene Product, a New Diterpene Synthase for Producing Tuberculosinol and (13R, S)-Isotuberculosinol (Nosyberkol), from the Mycobacterium tuberculosis H37Rv Genome. *Bioscience, Biotechnology, and Biochemistry* **2011**, *75*, 75-81.

73. Layre, E.; Lee, H. J.; Young, D. C.; Jezek Martinot, A.; Buter, J.; Minnaard, A. J.; Annand, J. W.; Fortune, S. M.; Snider, B. B.; Matsunaga, I.; Rubin, E. J.; Alber, T.; Moody, D. B., Molecular profiling of Mycobacterium tuberculosis identifies tuberculosinyl nucleoside products of the virulence-associated enzyme Rv3378c. *Proceedings of the National Academy of Sciences* **2014**, *111*, 2978-2983.
74. Zhao, B.; Lin, X.; Lei, L.; Lamb, D. C.; Kelly, S. L.; Waterman, M. R.; Cane, D. E., Biosynthesis of the Sesquiterpene Antibiotic Albaflavenone in Streptomyces coelicolor A3(2). *Journal of Biological Chemistry* **2008**, *283*, 8183-8189.
75. Zhao, B.; Lei, L.; Vassilyev, D. G.; Lin, X.; Cane, D. E.; Kelly, S. L.; Yuan, H.; Lamb, D. C.; Waterman, M. R., Crystal Structure of Albaflavenone Monooxygenase Containing a Moonlighting Terpene Synthase Active Site. *Journal of Biological Chemistry* **2009**, *284*, 36711-36719.
76. Quaderer, R.; Omura, S.; Ikeda, H.; Cane, D. E., Pentalenolactone Biosynthesis. Molecular Cloning and Assignment of Biochemical Function to PtII, a Cytochrome P450 of Streptomyces avermitilis. *Journal of the American Chemical Society* **2006**, *128*, 13036-13037.
77. Seo, M.-J.; Zhu, D.; Endo, S.; Ikeda, H.; Cane, D. E., Genome Mining in Streptomyces . Elucidation of the Role of Baeyer–Villiger Monooxygenases and Non-Heme Iron-Dependent Dehydrogenase/Oxygenases in the Final Steps of the Biosynthesis of Pentalenolactone and Neopentalenolactone. *Biochemistry* **2011**, *50*, 1739-1754.
78. You, Z.; Omura, S.; Ikeda, H.; Cane, D. E., Pentalenolactone Biosynthesis. Molecular Cloning and Assignment of Biochemical Function to PtH, A Non-Heme Iron Dioxygenase of Streptomyces avermitilis. *Journal of the American Chemical Society* **2006**, *128*, 6566-6567.
79. You, Z.; Omura, S.; Ikeda, H.; Cane, D. E.; Jogl, G., Crystal Structure of the Non-heme Iron Dioxygenase PtH in Pentalenolactone Biosynthesis. *Journal of Biological Chemistry* **2007**, *282*, 36552-36560.
80. You, Z.; Omura, S.; Ikeda, H.; Cane, D. E., Pentalenolactone biosynthesis: Molecular cloning and assignment of biochemical function to PtIF, a short-chain dehydrogenase from Streptomyces avermitilis, and identification of a new biosynthetic intermediate. *Archives of Biochemistry and Biophysics* **2007**, *459*, 233-240.
81. Jiang, J.; Tetzlaff, C. N.; Takamatsu, S.; Iwatsuki, M.; Komatsu, M.; Ikeda, H.; Cane, D. E., Genome Mining in Streptomyces avermitilis : A Biochemical Baeyer–Villiger Reaction and Discovery of a New Branch of the Pentalenolactone Family Tree. *Biochemistry* **2009**, *48*, 6431-6440.
82. Zhu, D.; Seo, M.-J.; Ikeda, H.; Cane, D. E., Genome Mining in Streptomyces . Discovery of an Unprecedented P450-Catalyzed Oxidative Rearrangement That Is the Final Step in the Biosynthesis of Pentalenolactone. *Journal of the American Chemical Society* **2011**, *133*, 2128-2131.
83. Nett, R. S.; Montano, M.; Marcassa, A.; Lu, X.; Nagel, R.; Charles, T. C.; Hedden, P.; Rojas, M. C.; Peters, R. J., Elucidation of gibberellin biosynthesis in bacteria reveals convergent evolution. *Nature Chemical Biology* **2017**, *13*, 69-74.
84. Nett, R. S.; Contreras, T.; Peters, R. J., Characterization of CYP115 As a Gibberellin 3-Oxidase Indicates That Certain Rhizobia Can Produce Bioactive Gibberellin A 4. *ACS Chemical Biology* **2017**, *12*, 912-917.
85. Rudolf, J. D.; Dong, L.-B.; Zhang, X.; Renata, H.; Shen, B., Cytochrome P450-Catalyzed Hydroxylation Initiating Ether Formation in Platensimycin Biosynthesis. *Journal of the American Chemical Society* **2018**, *140*, 12349-12353.
86. Dong, L.-B.; Zhang, X.; Rudolf, J. D.; Deng, M.-R.; Kalkreuter, E.; Cepeda, A. J.; Renata, H.; Shen, B., Cryptic and Stereospecific Hydroxylation, Oxidation, and Reduction in Platensimycin and Platencin Biosynthesis. *Journal of the American Chemical Society* **2019**, *141*, 4043-4050.
87. Wang, N.; Rudolf, J. D.; Dong, L.-B.; Osipiuk, J.; Hatzos-Skintges, C.; Endres, M.; Chang, C.-Y.; Babnigg, G.; Joachimiak, A.; Phillips, G. N.; Shen, B., Natural separation of the acyl-CoA ligase reaction results in a non-adenylating enzyme. *Nature Chemical Biology* **2018**, *14*, 730-737.
88. Dong, L.-B.; Rudolf, J. D.; Shen, B., A Mutasynthetic Library of Platensimycin and Platencin Analogues. *Organic Letters* **2016**, *18*, 4606-4609.

89. Sowden, R. J.; Yasmin, S.; Rees, N. H.; Bell, S. G.; Wong, L.-L., Biotransformation of the sesquiterpene (+)-valencene by cytochrome P450cam and P450BM-3. *Organic & Biomolecular Chemistry* **2005**, *3*, 57-57.
90. Janocha, S.; Zapp, J.; Hutter, M.; Kleser, M.; Bohlmann, J.; Bernhardt, R., Resin Acid Conversion with CYP105A1: An Enzyme with Potential for the Production of Pharmaceutically Relevant Diterpenoids. *ChemBioChem* **2013**, *14*, 467-473.
91. Janocha, S.; Bernhardt, R., Design and characterization of an efficient CYP105A1-based whole-cell biocatalyst for the conversion of resin acid diterpenoids in permeabilized Escherichia coli. *Applied Microbiology and Biotechnology* **2013**, *97*, 7639-7649.
92. Takamatsu, S.; Xu, L.-H.; Fushinobu, S.; Shoun, H.; Komatsu, M.; Cane, D. E.; Ikeda, H., Pentalenic acid is a shunt metabolite in the biosynthesis of the pentalenolactone family of metabolites: hydroxylation of 1-deoxypentalenic acid mediated by CYP105D7 (SAV\_7469) of Streptomyces avermitilis. *The Journal of Antibiotics* **2011**, *64*, 65-71.
93. Bleif, S.; Hannemann, F.; Lisurek, M.; von Kries, J. P.; Zapp, J.; Dietzen, M.; Antes, I.; Bernhardt, R., Identification of CYP106A2 as a Regioselective Allylic Bacterial Diterpene Hydroxylase. *ChemBioChem* **2011**, *12*, 576-582.
94. Girhard, M.; Machida, K.; Itoh, M.; Schmid, R. D.; Arisawa, A.; Urlacher, V. B., Regioselective biooxidation of (+)-valencene by recombinant E. coli expressing CYP109B1 from Bacillus subtilis in a two-liquid-phase system. *Microbial Cell Factories* **2009**, *8*, 36-36.
95. von Bühler, C.; Le-Huu, P.; Urlacher, V. B., Cluster Screening: An Effective Approach for Probing the Substrate Space of Uncharacterized Cytochrome P450s. *ChemBioChem* **2013**, *14*, 2189-2198.
96. Ewen, K. M.; Hannemann, F.; Khatri, Y.; Perlova, O.; Kappl, R.; Krug, D.; Hüttermann, J.; Müller, R.; Bernhardt, R., Genome Mining in Sorangium cellulosum So ce56. *Journal of Biological Chemistry* **2009**, *284*, 28590-28598.
97. Schiffrin, A.; Litzenburger, M.; Ringle, M.; Ly, T. T. B.; Bernhardt, R., New Sesquiterpene Oxidations with CYP260A1 and CYP264B1 from Sorangium cellulosum So ce56. *ChemBioChem* **2015**, *16*, 2624-2632.
98. Ly, T. T. B.; Schiffrin, A.; Nguyen, B. D.; Bernhardt, R., Improvement of a P450-Based Recombinant Escherichia coli Whole-Cell System for the Production of Oxygenated Sesquiterpene Derivatives. *Journal of Agricultural and Food Chemistry* **2017**, *65*, 3891-3899.
99. Rinkel, J.; Litzenburger, M.; Bernhardt, R.; Dickschat, J. S., An Isotopic Labelling Strategy to Study Cytochrome P450 Oxidations of Terpenes. *ChemBioChem* **2018**, *19*, 1498-1501.
